# Supplementary material for: Canagliflozin attenuates the progression of atherosclerosis and inflammation process in APOE knockout mice
Source: Springer Nature journal article supplement (doi:10.1186/s12933-018-0749-1), 2018-07-26

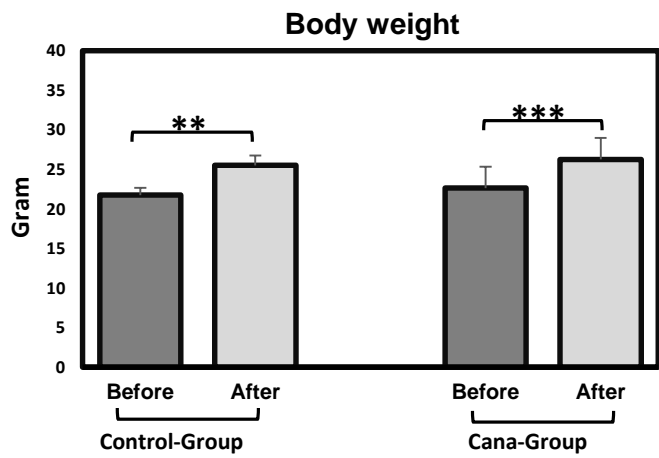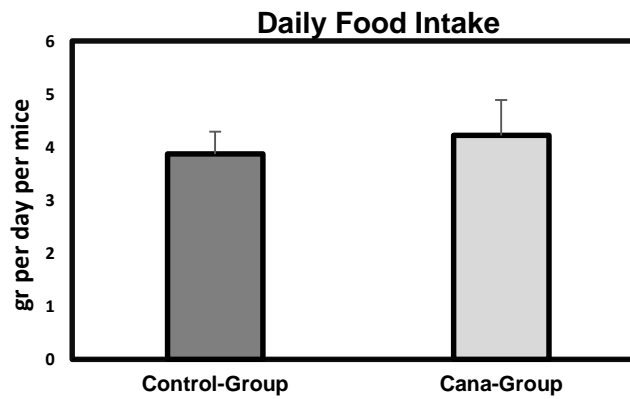

Supplement: MOESM1 [file 15980842]
